# Supplementary material for: Oxytocin-mediated social enrichment promotes longer telomeres and novelty seeking
Source: eLife. 2018 Nov 13;7:e40262. doi: 10.7554/eLife.40262 (PMC6277206; doi:10.7554/eLife.40262)
Supplement: Figure 1—source data 1. [file elife-40262-fig1-data1.xlsx]

## Sheet: Experiment 1
			STANDARD Housing Condition-M&F								SOCIAL Housing Condition -M&F
		ID	Sex	OT (pM)		ID	Sex	OT (pM)		ID	Sex	OT (pM)		ID	Sex	OT (pM)
		1	f	91.12		28	m	129.14		1	f	138.45		28	m	44.16
		2	f	103.36		29	m	91.72		2	f	71.92		29	m	107.34
		3	f	88.51		30	m	55.75		3	f	116.14		30	m	91.05
		4	f	74.16		31	m	63.49		4	f	127.35		31	m	129.27
		5	f	78.38		32	m	73.66		5	f	104.54		32	m	91.78
		6	f	51.46		33	m	43.38		6	f	110.78		33	m	68.32
		7	f	70.39		34	m	82.14		7	f	119.46		34	m	86.14
		8	f	51.9		35	m	58.27		8	f	103.64		35	m	123.42
		9	f	66.13		36	m	109.6		9	f	119.37		36	m	112.79
		10	f	102.51		37	m	50.81		10	f	60.36		37	m	73.16
		11	f	43.03		38	m	47.33		11	f	99.32		38	m	88.46
		12	f	98.25		39	m	43.82		12	f	115.82		39	m	105.02
		13	f	84.75		40	m	40.28		13	f	57.43		40	m	45.93
		14	f	46.57		41	m	58.37		14	f	124.62		41	m	101.16
		15	f	76.24		42	m	64.72		15	f	136.82		42	m	54.72
		16	f	79.56		43	m	40.92		16	f	127.34		43	m	128.42
		17	f	66.04		44	m	88.26		17	f	108.33		44	m	90.65
		18	f	127.61		45	m	66.02		18	f	116.94		45	m	107.39
		19	f	89.94		46	m	51.14		19	f	122.35		46	m	68.33
		20	f	92.57		47	m	32.4		20	f	121.86		47	m	54.16
		21	f	111.33		48	m	41.7		21	f	58.57		48	m	127.26
						49	m	61.28		22	f	126.86		49	m	61.19
						50	m	36						50
			Estimates
			Dependent Variable:OT
			Group	Mean	Std. Error	95% Confidence Interval
						Lower Bound	Upper Bound
			St-Female	80.6576	5.40551	69.9063	91.409
			St-Male	62.1826	5.16515	51.9093	72.4559
			So-Female	108.558	5.28123	98.0536	119.062
			So-Male	89.0964	5.28123	78.5922	99.6005
			a. Based on modified population marginal mean.
