# Supplementary material for: Oxytocin-mediated social enrichment promotes longer telomeres and novelty seeking
Source: eLife. 2018 Nov 13;7:e40262. doi: 10.7554/eLife.40262 (PMC6277206; doi:10.7554/eLife.40262)
Supplement: Figure 1—source data 2. [file elife-40262-fig1-data2.xlsx]

## Sheet: Experiment 1
					STANDARD Housing Condition									SOCIAL Housing Condition
		ID	Sex	Telomere Length(bP)		ID	Sex	Telomere Length(bP)			ID	Sex	Telomere Length(bP)		ID	Sex	Telomere Length(bP)
		1	f	4632		28	m	4807			1	f	5309		24	m	4726
		2	f	4774		29	m	4939			2	f	5466		25	m	4883
		3	f	4701		30	m	4847			3	f	5471		26	m	5020
		4	f	4449		31	m	4781			4	f	5332		27	m	4903
		5	f	4638		32	m	4969			5	f	5211		28	m	4561
		6	f	4683		33	m	4716			6	f	5336		29	m	4118
		7	f	4735		34	m	4667			7	f	5419		30	m	4884
		8	f	4900		35	m	4577			8	f	5472		31	m	4790
		9	f	4407		36	m	4612			9	f	5510		32	m	5026
		10	f	4853		37	m	4579			10	f	5371		33	m	4814
		11	f	4646		38	m	4691			11	f	5468		34	m	4976
		12	f	4781		39	m	4623			12	f	5439		35	m	4869
		13	f	4603		40	m	4901			13	f	5026		36	m	5008
		14	f	4889		41	m	4838			14	f	5213		37	m	5194
		15	f	4837		42	m	4906			15	f	5204		38	m	4348
		16	f	4873		43	m	4725			16	f	5285		39	m	4855
		17	f	4688		44	m	4588			17	f	5314		40	m	4770
		18	f	4745		45	m	4507			18	f	5338		41	m	4267
		19	f	4890		46	m	4394			19	f	5259		42	m	4104
		20	f	4681		47	m	4470			20	f	5366		43	m	4492
		21	f	4539		48	m	4569			21	f	5381		44	m	4907
		22	f	4692		49	m	4675			22	f	5416		45	m	4816
		23	f	4805		50	m	4428			23	f	5209		46	m	4919
		24	f	4763		51	m	4560							47	m	4702
		25	f	4855		52	m	4739							48	m	4871
		26	f	4637		53	m	4654							49	m	4246
		27	f	4824		54	m	4513							50	m	4515
						55	m	4466							51	m	4741
															52	m	4625
															53	m	4817
															54	m	4186
			2. Group
			Dependent Variable:TelomereL
			Group	Mean	Std. Error	95% Confidence Interval
						Lower Bound	Upper Bound
			St-Female	4722.96	37.4053	4648.8	4797.13
			St-Male	4669.32	36.7313	4596.49	4742.15
			So-Female	5339.78	40.5277	5259.42	5420.14
			So-Male	4708.16	34.9088	4638.94	4777.38
