# Supplementary material for: Oxytocin-mediated social enrichment promotes longer telomeres and novelty seeking
Source: eLife. 2018 Nov 13;7:e40262. doi: 10.7554/eLife.40262 (PMC6277206; doi:10.7554/eLife.40262)
Supplement: Figure 2—source data 1. [file elife-40262-fig2-data1.xlsx]

## Sheet: CFT-No Central Object
	CFT-No Centtral Object
									TIME SPENT IN EACH ZONE(s)												TIME SPENT IN EACH ZONE(s)
									STANDARD Housing Condition												SOCIAL Housing Condition
			ID	Sex	Corridor Time	Open Zone Time	Central Zone		ID	Sex	Corridor Time	Open Zone Time	Central Zone			ID	Sex	Corridor Time	Open Zone Time	Central Zone		ID	Sex	Corridor Time	Open Zone Time	Central Zone
			1	f	339	128	13		1	m	281	186	13			1	f	239	123	118		1	m	303	108	69
			2	f	318	119	43		2	m	344	128	8			2	f	132	182	166		2	m	269	159	52
			3	f	317	141	22		3	m	331	121	28			3	f	281	86	113		3	m	344	115	21
			4	f	356	111	13		4	m	297	107	76			4	f	277	170	33		4	m	318	123	39
			5	f	309	139	32		5	m	389	46	45			5	f	341	100	39		5	m	346	106	28
			6	f	288	151	41		6	m	377	69	34			6	f	251	168	61		6	m	303	147	30
			7	f	320	151	9		7	m	405	67	8			7	f	263	129	88		7	m	317	122	41
			8	f	302	144	34		8	m	366	103	11			8	f	202	149	129		8	m	224	192	64
			9	f	329	129	22		9	m	341	104	35			9	f	288	101	91		9	m	229	185	66
			10	f	358	116	6		10	m	368	55	57			10	f	316	153	11		10	m	261	161	58
			11	f	307	161	12		11	m	313	93	74			11	f	331	121	28		11	m	213	234	33
			12	f	291	169	20		12	m	326	119	35			12	f	283	171	26		12	m	266	175	39
			13	f	281	177	22		13	m	269	168	43			13	f	166	247	67		13	m	229	223	28
			14	f	348	131	1		14	m	257	148	75			14	f	181	202	97		14	m	207	227	46
			15	f	324	149	7		15	m	391	66	23			15	f	156	243	81		15	m	251	186	43
			16	f	306	155	19		16	m	309	116	55			16	f	169	225	86		16	m	288	190	2
									17	m	288	120	72			17	f	204	228	48		17	m	263	199	18
																18	f	159	262	59
																19	f	269	115	96
																20	f	126	266	88
																21	f	99	312	69
																22	f	114	328	38
					Estimates
							95% Confidence Interval
			Dependent Variable	Group	Mean	Std. Error	Lower Bound	Upper Bound
			CorridorT	St-Female	318.313a	13.137	292.099	344.526
				St-Male	332.471a	12.745	307.039	357.902
				So-Female	220.318a	11.203	197.963	242.674
				So-Male	272.412a	12.745	246.98	297.843
			OpenzoneT	St-Female	141.938a	12.165	117.662	166.213
				St-Male	106.824a	11.802	83.273	130.374
				So-Female	185.500a	10.375	164.798	206.202
				So-Male	167.765a	11.802	144.214	191.316
			CentralT	St-Female	19.750a	6.615	6.55	32.95
				St-Male	40.706a	6.418	27.9	53.512
				So-Female	74.182a	5.641	62.925	85.439
				So-Male	39.824a	6.418	27.017	52.63
			a. Based on modified population marginal mean.

## Sheet: CFT-Central Object
	CFT- Centtral Object
									TIME SPENT IN EACH ZONE(s)														TIME SPENT IN EACH ZONE(s)
									STANDARD Housing Condition														SOCIAL Housing Condition
			ID	Sex	Corridor Time	Open Zone Time	Central Zone		ID	Sex	Corridor Time	Open Zone Time	Central Zone				ID	Sex	Corridor Time	Open Zone Time	Central Zone		ID	Sex	Corridor Time	Open Zone Time	Central Zone
			1	f	328	119	33		1	m	284	133	63				1	f	117	209	154		1	m	269	171	40
			2	f	305	129	46		2	m	339	129	12				2	f	139	193	148		2	m	241	208	31
			3	f	321	114	45		3	m	371	93	16				3	f	136	237	107		3	m	270	167	43
			4	f	351	93	36		4	m	302	141	37				4	f	133	249	98		4	m	237	159	84
			5	f	269	137	74		5	m	339	93	48				5	f	109	304	67		5	m	231	166	83
			6	f	293	128	59		6	m	336	91	53				6	f	151	201	128		6	m	212	174	94
			7	f	338	133	9		7	m	355	83	42				7	f	106	207	167		7	m	241	139	100
			8	f	327	118	35		8	m	308	148	24				8	f	144	233	103		8	m	236	146	98
			9	f	332	116	32		9	m	366	83	31				9	f	131	206	143		9	m	218	138	124
			10	f	285	124	71		10	m	374	73	33				10	f	128	247	105		10	m	231	126	123
			11	f	346	100	34		11	m	306	108	66				11	f	144	251	85		11	m	240	139	101
			12	f	293	97	90		12	m	354	79	47				12	f	53	201	226		12	m	261	128	91
			13	f	317	103	60		13	m	319	131	30				13	f	146	238	96		13	m	206	149	125
			14	f	336	129	15		14	m	303	128	49				14	f	104	212	164		14	m	244	168	68
			15	f	298	122	60		15	m	328	106	46				15	f	85	242	153		15	m	239	176	65
			16	f	291	138	51		16	m	337	98	45				16	f	137	229	114		16	m	267	170	43
									17	m	306	129	45				17	f	149	202	129		17	m	269	183	28
																	18	f	156	190	134
																	19	f	94	212	174
																	20	f	129	219	132
																	21	f	104	228	148
																	22	f	127	236	117
					Estimates
							95% Confidence Interval
			Dependent Variable	Group	Mean	Std. Error	Lower Bound	Upper Bound
			CorridorT	St-Female	314.375a	6.071	302.26	326.49
				St-Male	331.000a	5.89	319.246	342.754
				So-Female	123.727a	5.178	113.395	134.059
				So-Male	241.882a	5.89	230.129	253.636
			OpenzoneT	St-Female	118.750a	5.576	107.623	129.877
				St-Male	108.588a	5.409	97.794	119.383
				So-Female	224.818a	4.755	215.329	234.307
				So-Male	159.235a	5.409	148.441	170.03
			CentralT	St-Female	46.875a	7.023	32.862	60.888
				St-Male	40.412a	6.813	26.817	54.007
				So-Female	131.455a	5.989	119.504	143.405
				So-Male	78.882a	6.813	65.287	92.477
				a. Based on modified population marginal mean.
