# Supplementary material for: Oxytocin-mediated social enrichment promotes longer telomeres and novelty seeking
Source: eLife. 2018 Nov 13;7:e40262. doi: 10.7554/eLife.40262 (PMC6277206; doi:10.7554/eLife.40262)
Supplement: Figure 3—source data 1. [file elife-40262-fig3-data1.xlsx]

## Sheet: Experiment2
				STANDARD Housing Condition								SOCIAL Housing Condition
			Control	OT ANT			Control	OT ANT				Control	OT ANT			Control	OT ANT
	ID	Sex	OT(pM)	OT (pM)	ID	Sex	OT(pM)	OT (pM)		ID	Sex	OT(pM)	OT (pM)	ID	Sex	OT(pM)	OT (pM)
	1	F	88.14	44.58	1	M	61.54	49.35		1	F	93.16	67.39	1	M	76.88	52.36
	2	F	76.32	87.23	2	M	73.68	71.57		2	F	113.65	74.25	2	M	100.34	47.29
	3	F	91.45	60.18	3	M	64.54	56.14		3	F	88.44	88.59	3	M	83.56	91.16
	4	F	90.53	62.37	4	M	91.17	56.73		4	F	100.36	93.01	4	M	88.47	90.88
	5	F	70.26	74.59	5	M	84.59	81.03		5	F	88.47	80.24	5	M	67.32	63.41
	6	F	78.54	61.11	6	M	52.09	70.18		6	F	91.45	62.68	6	M	74.25	53.02
	7	F	93.26	67.36	7	M	73.29	57.88		7	F	116.24	71.15	7	M	91.16	47.18
	8	F	74.37	79.22	8	M	55.82	46.36		8	F	117.48	60.2	8	M	96.44	73.47
	9	F	83.55	53.63	9	M	96.21	40.19		9	F	113	63.17	9	M	103.83	52.13
	10	F	96.04	59.48	10	M	62.1	53.94		10	F	101.55	42.9	10	M	92.4	59.86
	11	F	75.23		11	M	49.01	43.15		11	F	80.61	74.02	11	M	76.03	40.29
					12	M	52.47			12	F	122.34		12	M	79.28
					13	M	68.92
					4. Status * Group
			Dependent Variable:OTlevels
							95% Confidence Interval
			Status	Group	Mean	Std. Error	Lower Bound	Upper Bound
			Standard	St-M-Blocked	56.956	4.064	48.873	65.04
				St-M-Control	68.11	3.738	60.674	75.546
				St-F-Blocked	64.975	4.262	56.497	73.453
				St-F-Control	83.426	4.064	75.343	91.51
			Social	So-M-Blocked	61.005	4.064	52.921	69.088
				So-M-Control	85.83	3.891	78.091	93.569
				So-F-Blocked	70.691	4.064	62.608	78.774
				So-F-Control	102.229	3.891	94.49	109.968
