# Supplementary material for: Oxytocin-mediated social enrichment promotes longer telomeres and novelty seeking
Source: eLife. 2018 Nov 13;7:e40262. doi: 10.7554/eLife.40262 (PMC6277206; doi:10.7554/eLife.40262)
Supplement: Figure 4—source data 1. [file elife-40262-fig4-data1.xlsx]

## Sheet: CFT-Central Ob 
	CFT-Centtral Object
									TIME SPENT IN EACH ZONE(s)
									STANDARD Housing Condition
			ID	Sex	Corridor Time	Open Zone Time	Central Zone		ID	Sex	Corridor Time	Open Zone Time	Central Zone		ID	Sex	Corridor Time	Open Zone Time	Central Zone		ID	Sex	Corridor Time	Open Zone Time	Central Zone
			1	f-ANT	292	84	104		1	f	344	117	19		1	m-ANT	307	84	89		1	m	266	133	81
			2	f-ANT	307	93	80		2	f	316	131	33		2	m-ANT	313	126	41		2	m	311	121	48
			3	f-ANT	321	106	53		3	f	275	108	97		3	m-ANT	318	118	44		3	m	281	103	96
			4	f-ANT	318	101	61		4	f	347	94	39		4	m-ANT	269	132	79		4	m	289	144	47
			5	f-ANT	339	94	47		5	f	298	118	64		5	m-ANT	325	93	62		5	m	244	107	129
			6	f-ANT	344	114	22		6	f	255	91	134		6	m-ANT	311	91	78		6	m	293	119	68
			7	f-ANT	315	96	69								7	m-ANT	294	127	59
			8	f-ANT	288	83	109
									TIME SPENT IN EACH ZONE(s)
								SOCIAL Housing Condition
			ID	Sex	Corridor Time	Open Zone Time	Central Zone		ID	Sex	Corridor Time	Open Zone Time	Central Zone		ID	Sex	Corridor Time	Open Zone Time	Central Zone		ID	Sex	Corridor Time	Open Zone Time	Central Zone
			1	f-ANT	341	117	22		1	f	167	188	125		1	m-ANT	292	121	67		1	m	267	94	119
			2	f-ANT	367	109	4		2	f	186	187	107		2	m-ANT	270	137	73		2	m	281	111	88
			3	f-ANT	391	63	26		3	f	209	166	105		3	m-ANT	295	104	81		3	m	318	107	55
			4	f-ANT	316	106	58		4	f	91	248	141		4	m-ANT	281	133	66		4	m	261	209	10
			5	f-ANT	299	127	54		5	f	165	219	96		5	m-ANT	257	129	94		5	m	159	201	120
			6	f-ANT	333	106	41		6	f	83	239	158		6	m-ANT	311	116	53		6	m	163	157	160
			7	f-ANT	341	127	12								7	m-ANT	296	114	70
			8	f-ANT	377	84	19
										4. Status * Group
												95% Confidence Interval
							Dependent Variable	Status	Group	Mean	Std. Error	Lower Bound	Upper Bound
							CorridorT	Standard	St-M-Blocked	305.286	13.399	278.314	332.257
									St-M-Control	280.667	14.473	251.534	309.799
									St-F-Blocked	315.5	12.534	290.27	340.73
									St-F-Control	305.833	14.473	276.701	334.966
								Social	So-M-Blocked	286	13.399	259.028	312.972
									So-M-Control	241.5	14.473	212.367	270.633
									So-F-Blocked	345.625	12.534	320.395	370.855
									So-F-Control	150.167	14.473	121.034	179.299
							OpenzoneT	Standard	St-M-Blocked	110.143	9.253	91.517	128.768
									St-M-Control	121.167	9.994	101.049	141.285
									St-F-Blocked	96.375	8.655	78.952	113.798
									St-F-Control	109.833	9.994	89.715	129.951
								Social	So-M-Blocked	122	9.253	103.374	140.626
									So-M-Control	146.5	9.994	126.382	166.618
									So-F-Blocked	104.875	8.655	87.452	122.298
									So-F-Control	207.833	9.994	187.715	227.951
							CentralT	Standard	St-M-Blocked	64.571	11.586	41.25	87.893
									St-M-Control	78.167	12.514	52.977	103.356
									St-F-Blocked	68.125	10.838	46.31	89.94
									St-F-Control	64.333	12.514	39.144	89.523
								Social	So-M-Blocked	72	11.586	48.679	95.321
									So-M-Control	92	12.514	66.81	117.19
									So-F-Blocked	29.5	10.838	7.685	51.315
									So-F-Control	122	12.514	96.81	147.19
							a. This level combination of factors is not observed, thus the corresponding population marginal mean is not estimable.

## Sheet: CFT-No Central Ob
		CFT- No Centtral Object
										TIME SPENT IN EACH ZONE(s)
										STANDARD Housing Condition
				ID	Sex	Corridor Time	Open Zone Time	Central Zone		ID	Sex	Corridor Time	Open Zone Time	Central Zone		ID	Sex	Corridor Time	Open Zone Time	Central Zone		ID	Sex	Corridor Time	Open Zone Time	Central Zone
				1	f-ANT	301	147	32		1	f	304	121	55		1	m-ANT	349	104	27		1	m	271	153	56
				2	f-ANT	339	101	40		2	f	317	127	36		2	m-ANT	351	116	13		2	m	279	117	84
				3	f-ANT	347	89	44		3	f	247	152	81		3	m-ANT	347	99	34		3	m	337	66	77
				4	f-ANT	343	111	26		4	f	239	181	60		4	m-ANT	335	129	16		4	m	368	71	41
				5	f-ANT	381	68	31		5	f	306	132	42		5	m-ANT	285	175	20		5	m	255	159	66
				6	f-ANT	363	101	16		6	f	327	121	32		6	m-ANT	318	143	19		6	m	283	102	95
				7	f-ANT	352	116	12		7	f	304	130	46		7	m-ANT	369	101	10
				8	f-ANT	336	103	41
										TIME SPENT IN EACH ZONE(s)
										SOCIAL Housing Condition
				ID	Sex	Corridor Time	Open Zone Time	Central Zone		ID	Sex	Corridor Time	Open Zone Time	Central Zone		ID	Sex	Corridor Time	Open Zone Time	Central Zone		ID	Sex	Corridor Time	Open Zone Time	Central Zone
				1	f-ANT	361	106	13		1	f	209	187	84		1	m-ANT	316	127	37		1	m	226	201	53
				2	f-ANT	301	163	16		2	f	288	131	61		2	m-ANT	303	151	26		2	m	208	237	35
				3	f-ANT	327	105	48		3	f	253	163	64		3	m-ANT	317	141	22		3	m	269	161	50
				4	f-ANT	305	146	29		4	f	187	166	127		4	m-ANT	281	106	53		4	m	247	204	29
				5	f-ANT	251	170	59		5	f	188	209	83		5	m-ANT	301	112	67		5	m	280	176	24
				6	f-ANT	326	126	28		6	f	199	154	127		6	m-ANT	344	103	33		6	m	254	148	78
				7	f-ANT	351	108	21								7	m-ANT	218	210	52
				8	f-ANT	363	98	19
								4. Status * Group
										95% Confidence Interval
					Dependent Variable	Status	Group	Mean	Std. Error	Lower Bound	Upper Bound
					CorridorT	Standard	St-M-Blocked	336.286	13.086	309.96	362.612
							St-M-Control	298.833	14.135	270.398	327.269
							St-F-Blocked	345.25	12.241	320.624	369.876
							St-F-Control	292	13.086	265.674	318.326
						Social	So-M-Blocked	297.143	13.086	270.817	323.469
							So-M-Control	247.333	14.135	218.898	275.769
							So-F-Blocked	323.125	12.241	298.499	347.751
							So-F-Control	220.667	14.135	192.231	249.102
					OpenzoneT	Standard	St-M-Blocked	123.857	11.132	101.463	146.251
							St-M-Control	111.333	12.023	87.145	135.521
							St-F-Blocked	104.5	10.413	83.552	125.448
							St-F-Control	137.714	11.132	115.32	160.108
						Social	So-M-Blocked	141.429	11.132	119.035	163.822
							So-M-Control	187.833	12.023	163.645	212.021
							So-F-Blocked	127.75	10.413	106.802	148.698
							So-F-Control	168.333	12.023	144.145	192.521
					CentralT	Standard	St-M-Blocked	19.857	6.694	6.391	33.324
							St-M-Control	69.833	7.23	55.288	84.379
							St-F-Blocked	30.25	6.262	17.653	42.847
							St-F-Control	50.286	6.694	36.819	63.752
						Social	So-M-Blocked	41.429	6.694	27.962	54.895
							So-M-Control	44.833	7.23	30.288	59.379
							So-F-Blocked	29.125	6.262	16.528	41.722
							So-F-Control	91	7.23	76.455	105.545
					a. This level combination of factors is not observed, thus the corresponding population marginal mean is not estimable.
