# Supplementary material for: Oxytocin-mediated social enrichment promotes longer telomeres and novelty seeking
Source: eLife journal article supplement (doi:10.7554/elife.40262), 2018-11-13
Supplement: supp [file elife_poa_e40262_Figure_3_source_data_2.xlsx]

## Sheet: Experiment2-TL-Standard
							STANDARD Housing Condition-n=48
		ID	Sex	Telomere Length(bP)	ID	Sex	Telomere Length(bP)	ID	Sex	Telomere Length(bP)	ID	Sex	Telomere Length(bP)
		1	f	4736	1	f-ANT	4912	1	m	4572	1	m-ANT	4933
		2	f	4478	2	f-ANT	4730	2	m	4039	2	m-ANT	4464
		3	f	4745	3	f-ANT	4688	3	m	4470	3	m-ANT	4103
		4	f	5041	4	f-ANT	4619	4	m	4821	4	m-ANT	4218
		5	f	4956	5	f-ANT	4472	5	m	4996	5	m-ANT	4038
		6	f	4872	6	f-ANT	4690	6	m	5023	6	m-ANT	4720
		7	f	4120	7	f-ANT	4938	7	m	4418	7	m-ANT	4572
		8	f	4339	8	f-ANT	4571	8	m	4733	8	m-ANT	4561
		9	f	4068	9	f-ANT	4598	9	m	4784	9	m-ANT	4509
		10	f	4931	10	f-ANT	4638	10	m	4892	10	m-ANT	4811
		11	f	5160	11	f-ANT	4459	11	m	4311	11	m-ANT	4219
					12	f-ANT	4117	12	m	4699	12	m-ANT	5038
					13	f-ANT	4870
			Estimates
			Dependent Variable:Tlength
			Group	Mean	Std. Error	95% Confidence Interval
						Lower Bound	Upper Bound
			St-M-Blocked	4515.5	88.753	4330.23	4700.77
			St-M-Control	4646.5	88.753	4461.23	4831.77
			St-F-Blocked	4638.61	85.271	4460.62	4816.61
			St-F-Control	4676.91	92.7	4483.4	4870.41
			So-M-Blocked	4489.27	92.7	4295.77	4682.78
			So-M-Control	4592.92	88.753	4407.65	4778.18
			So-F-Blocked	4794.5	97.22	5041.55	5447.45
			So-F-Control	5237.17	88.75	5018.57	5389.1

## Sheet: Experiment2-TL-Social 
						SOCIAL Housing Condition-n=45
	ID	Sex	Telomere Length(bP)	ID	Sex	Telomere Length(bP)	ID	Sex	Telomere Length(bP)	ID	Sex	Telomere Length(bP)
	1	f	5469	1	f-ANT	5169	1	m	4111	1	m-ANT	4690
	2	f	5520	2	f-ANT	5018	2	m	4963	2	m-ANT	4312
	3	f	5018	3	f-ANT	4740	3	m	4918	3	m-ANT	4016
	4	f	4937	4	f-ANT	4901	4	m	4467	4	m-ANT	4783
	5	f	5681	5	f-ANT	4366	5	m	4701	5	m-ANT	4539
	6	f	5073	6	f-ANT	5011	6	m	4459	6	m-ANT	4721
	7	f	5068	7	f-ANT	4727	7	m	4916	7	m-ANT	4916
	8	f	5644	8	f-ANT	4469	8	m	4355	8	m-ANT	4351
	9	f	4807	9	f-ANT	5030	9	m	4822	9	m-ANT	4866
	10	f	4963	10	f-ANT	4514	10	m	4761	10	m-ANT	4115
	11	f	5617				11	m	4593	11	m-ANT	4073
	12	f	5049				12	m	4049
			2. Group
	Dependent Variable:Tlength
				95% Confidence Interval
	Group	Mean	Std. Error	Lower Bound	Upper Bound
	St-M-Blocked	4515.5	88.753	4339.03	4691.97
	St-M-Control	4646.5	88.753	4470.03	4822.97
	St-F-Blocked	4638.61	85.271	4469.07	4808.16
	St-F-Control	4676.91	92.7	4492.6	4861.22
	So-M-Blocked	4489.27	92.7	4304.96	4673.58
	So-M-Control	4592.92	88.753	4416.45	4769.38
	So-F-Blocked	4794.5	97.224	4601.19	4987.81
	So-F-Control	5237.17	88.753	5060.7	5413.63
					Tests of Between-Subjects Effects
	Dependent Variable:Tlength
	Source	Type III Sum of Squares	df	Mean Square	F	Sig.	Partial Eta Squared	Noncent. Parameter	Observed Powerb
	Corrected Model	4.675E6a	7	667925	7.066	0	0.368	49.463	1
	Intercept	2042000000	1	2042000000	21601.1	0	0.996	21601.1	1
	Group	4.67547e+06	7	667925	7.066	0	0.368	49.463	1
	Error	8.03464e+06	85	94525.2
	Total	2066000000	93
	Corrected Total	12710000	92
	a. R Squared = .368 (Adjusted R Squared = .316)
	b. Computed using alpha = .05
